# Supplementary material
Source: PubMed Central journal article supplement (PMC3577422)

# supplemental Figure 1

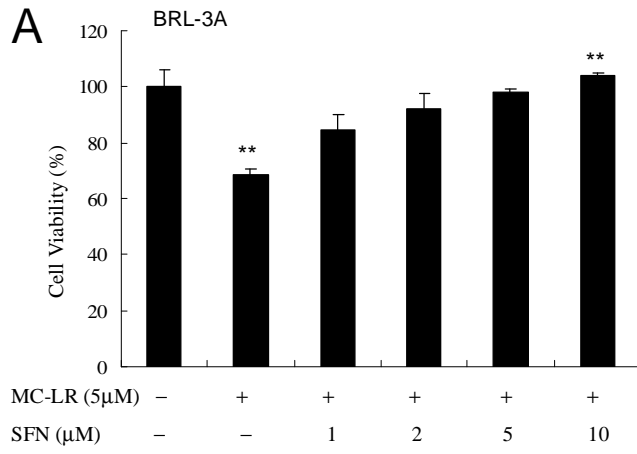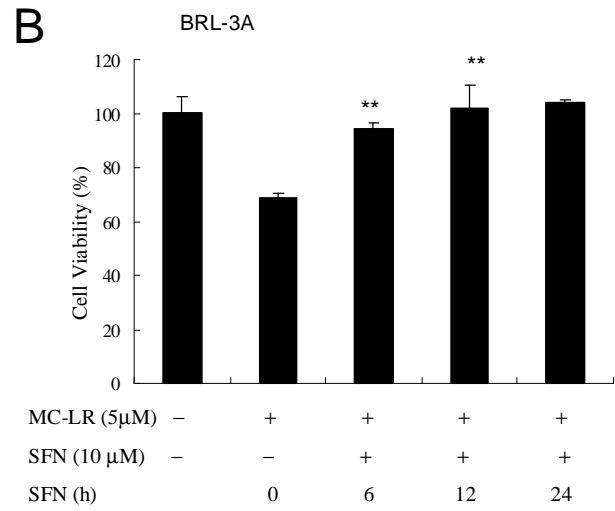

## supplemental Figure 2

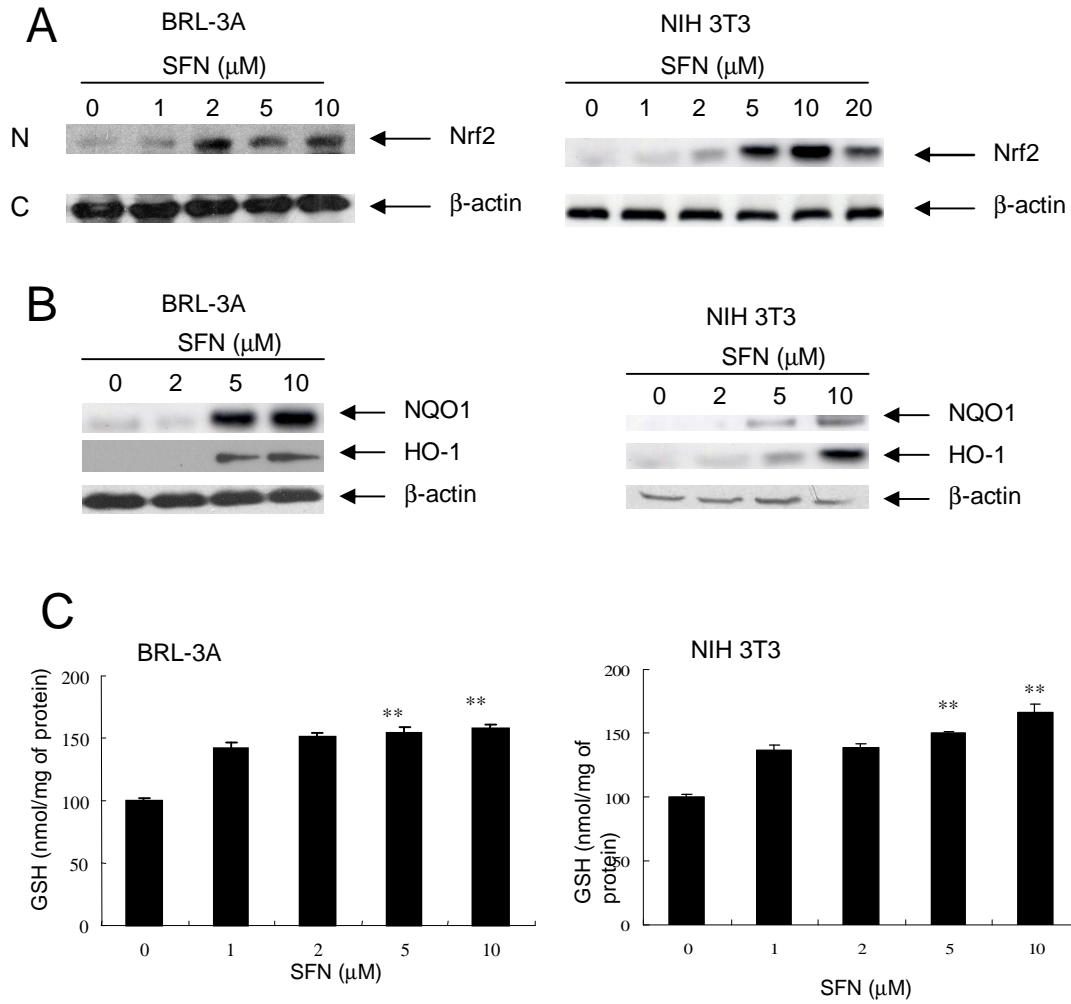

# supplemental Figure 3

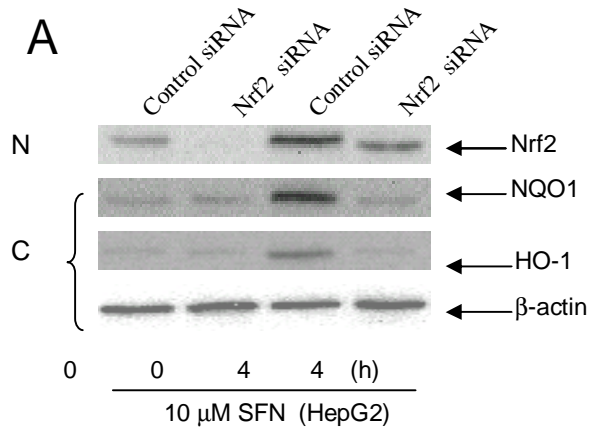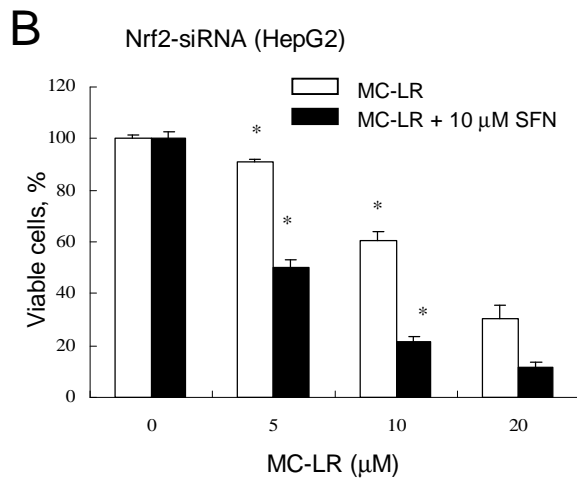

Supplement: NIHMS438271-supplement-Supplementary_Fig__1-3.pdf [file NIHMS438271-supplement-Supplementary_Fig__1-3.pdf]
